# Supplementary material
Source: PubMed Central journal article supplement (PMC7936355)
Supplement: pnas.1916337118.sapp.pdf [file pnas.1916337118.sapp.pdf]

## Supporting Information for

### **Cross-reactivity of a pathogenic autoantibody to a tumor antigen in GABA<sub>A</sub> receptor encephalitis**

Simone M. Brändle, Manuela Cerina, Susanne Weber, Kathrin Held, Amélie F. Menke, Carmen Alcalá, David Gebert, Alexander M. Herrmann, Hannah Pellkofer, Lisa Ann Gerdes, Stefan Bittner, Frank Leypoldt, Bianca Teegen, Lars Komorowski, Tania Kümpfel, Reinhard Hohlfeld, Sven G. Meuth, Bonaventura Casanova, Nico Melzer, Eduardo Beltrán, and Klaus Dornmair<sup>1</sup>

<sup>1</sup> Corresponding author: Klaus Dornmair

Klaus.Dornmair@med.uni-muenchen.de

Address: Institute for Clinical Neuroimmunology, LMU Munich, Großhaderner Str. 9, D-82152 Martinsried, Germany. Tel.: +49-89-2180-71664; FAX:+49-89-2180-71196

#### **This PDF file includes:**

Figure S1

Figure S2

Table S1

SI References

**Heavy chain: IGHV3-21\*01**

CDR1
CDR2  
 EVQLVESGG. GLVKPGGSLRLS CAASGFT **S** . . . . **S**FYSMNWVRQAPGKGLEWVSSISS . . SSYIYYADSVK .  
CDR3  
 GRFTISRDNKNSLYLQM **S**SLRADDTAVYY CAR . **VGIMEWSDPRFVDEK** . YGMDVWG QGTTVTVSS

**Light chain: IGKV3-20\*01**

CDR1
CDR2  
 EIVLTQSPGTLSPGERATLS CASRASQSVS . . . . . **S**RYLAWYQQKPGQAPRLLIYGA . . . . . SSRATGIP .  
CDR3  
 DRFSGSG . . SGTDF **I**LTISRLEPEDFAVYY CAQQYGSS **L** . . . . . YTFGQ GTKLEIK

**Figure S1: Sequence of the expanded antibody Ab-IP2 from patient IP2.**

Amino acid sequences of the dominant H- and  $\kappa$ -chains of antibody Ab-IP2 are shown. Amino acid mutations introduced by somatic hypermutation and recombination are printed in red letters. The canonical cystein (C) residues and the conserved sequences in the J-regions (WGXG and FGXG) are highlighted in grey. The complementarity determining regions (CDR) 1 to 3 are indicated.

**Figure S1**

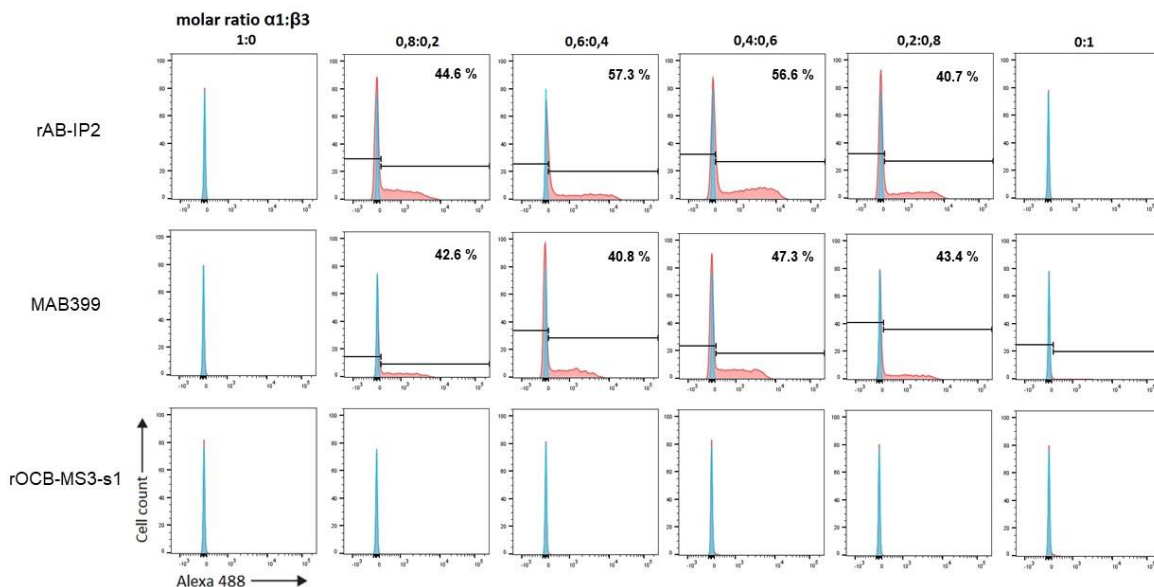

### Figure S2: rAB-IP2 recognizes GABA<sub>A</sub>-R

HEK293Expi cells, which grow in suspension, were transiently transfected with expression plasmids encoding the  $\alpha$ 1- and  $\beta$ 3-subunits of GABA<sub>A</sub>-R at different molar ratios shown in the uppermost lane. Cells were analyzed by flow cytometry for binding of rAb-IP2 (upper panel), the commercial anti-GABA<sub>A</sub>- $\alpha$ 1 antibody MAB399 (middle panel), and the negative control antibody rOCB-MS3-s1 (lowest panel). The percentages of positive cells are indicated in the plots. Binding of rAb-IP2 and MAB399 to transfected HEK293Expi cells was observed at different molar ratios of the  $\alpha$ 1- and  $\beta$ 3-subunits, while no binding was observed, when only one subunit was transfected.

## Figure S2

| Subject                | Disease type              | Age | Sex | OCBs | Disease-specific antibody titers (CBA) at diagnosis                     | Immunotherapy preceding biosampling     | Further clinical remarks                                                                                        |
|------------------------|---------------------------|-----|-----|------|-------------------------------------------------------------------------|-----------------------------------------|-----------------------------------------------------------------------------------------------------------------|
| IP2                    | GABA <sub>A</sub> -R Enc. | 51  | m   | yes  | Serum: GABA <sub>A</sub> -R > 1:1280; CSF: GABA <sub>A</sub> -R > 1:320 | IVIg, PLEX, Cyclophosphamide, Rituximab | ITP, AT (1)                                                                                                     |
| GABA <sub>A</sub> -R-1 | GABA <sub>A</sub> -R Enc. | 34  | m   | no   | Serum: GABA <sub>A</sub> -R 1:100; CSF: GABA <sub>A</sub> -R 1:10       | none                                    |                                                                                                                 |
| GABA <sub>A</sub> -R-2 | GABA <sub>A</sub> -R Enc. | 47  | f   | no   | Serum: GABA <sub>A</sub> -R 1:320; CSF: GABA <sub>A</sub> -R 1:10       | none                                    |                                                                                                                 |
| MS-1                   | RRMS                      | 38  | f   | yes  | none                                                                    | none                                    | anti-phospholipid antibody syndrome                                                                             |
| MS-2                   | RRMS                      | 21  | f   | yes* | none                                                                    | none                                    |                                                                                                                 |
| MS-3                   | RRMS                      | 23  | f   | yes  | none                                                                    | none                                    |                                                                                                                 |
| MS-4                   | PPMS                      | 43  | m   | yes* | none                                                                    | none                                    |                                                                                                                 |
| MS-5                   | PPMS                      | 45  | m   | yes  | none                                                                    | none                                    |                                                                                                                 |
| Enc-1                  | NMDAR Enc.                | 20  | f   | yes* | Serum: NMDA-R 1:3.2; CSF: NMDA-R negative                               | Rituximab                               | 3 cycles, 13 6, and 0.5 months before sampling                                                                  |
| Enc-2                  | LGI-1 Enc.                | 62  | m   | yes* | Serum: LGI-1 1:800; CSF: LGI-1 positive                                 | PLEX, Prednisolone                      | Both 2 months before sampling                                                                                   |
| Enc-3                  | GAD Enc.                  | 49  | f   | no   | Serum: GAD65 78 U/ml; CSF: GAD65 139 U/ml                               | Rituximab<br><br>Azathioprin            | 5 cycles ~every 6 months, starting 28 month before sampling.<br><br>starting 13 months before sampling, ongoing |
| NIC-1                  | IIH                       | 43  | f   | no   | none                                                                    | none                                    |                                                                                                                 |
| NIC-2                  | IIH                       | 57  | f   | no   | none                                                                    | none                                    |                                                                                                                 |
| NIC-3                  | IIH                       | 58  | m   | no   | none                                                                    | none                                    |                                                                                                                 |

**Table S1: Clinical characteristics of all subjects.** Columns 1 and 2 list the subjects and their disease types. We analyzed CSF samples from patient IP2, three other cases with idiopathic anti-GABA<sub>A</sub>-R encephalitis (GABA<sub>A</sub>-R-1 and -2), five cases with MS (MS-1 to -5), three cases with other forms of antibody associated CNS diseases (AACNSD-1 to -3), and three non-inflammatory disease controls (NID-1 to -3). Abbreviations are: RRMS = relapsing-remitting

MS; PPMS = primary progressive MS; NMDAR Enc = anti-N-Methyl-D-Aspartate-receptor encephalitis; LGI-1 Enc. = anti-leucine-rich-glioma-inactivated-1 associated encephalitis; GAD Enc. = anti-glutamic acid decarboxylase encephalitis; IHH = idiopathic intracranial hypertension. Column 3 lists the ages of the subjects, column 4 their sex, column 5 presence or absence of CSF-specific OCBs, column 6 the disease-specific antibody titers determined by cell-based-assays at diagnosis, column 7 the immunotherapies at the time point of lumbar puncture (LP), and column 8 further clinical remarks. Further abbreviations are: AT = autoimmune thyroiditis; CBA = cell-based-assay; ITP = idiopathic thrombocytopenic purpura; IVIG = intravenous immunoglobulines; PLEX = plasma exchange; OCB = oligoclonal bands: \* = in these subjects, OCBs were detected in CSF and in serum, indicating non-intrathecal OCB production.

## Table S1

### SI Reference

1. M. Petit-Pedrol et al., Encephalitis with refractory seizures, status epilepticus, and antibodies to the GABAA receptor: a case series, characterisation of the antigen, and analysis of the effects of antibodies. *Lancet Neurol* 13:276-286 (2014).
